# Supplementary material for: Toward a global calibration for quantifying past oxygenation inoxygen minimum zones using benthic Foraminifera
Source: Copernicus journal article supplement (doi:10.5194/bg-2020-482), 2021-02-03
Supplement: Supplementary file 2 [file Table S2.xlsx]

## Sheet: Feuil1
Species name	Dissolved oxygen range	Reference for O2			Reference n°	Corresponding reference
Bolivina advena	dysoxic	1,2			1	Sen Gupta and Machain-Castillo, 1993
Bolivina alata	dysoxic	2,13,14,17			2	Kaiho, 1994
Bolivina pygmaea	dysoxic	2,15,17			3	Cannariato and Kennett, 1999
Bolivina seminuda	dysoxic	1, 2, 9,14,15			4	Cannariato et al., 1999
Bolivina subadvena	dysoxic	1, 2			5	Moffitt et al., 2014
Bolivina tumida	dysoxic	2,4,10,20			6	Mullins et al., 1985
Bulimina mexicana	dysoxic	3			7	Douglas and Heitman, 1979
Buliminella tenuata	dysoxic	1,3,4,9,12,20			8	Blake, 1976
Chilostomella ovoidea	dysoxic	1,2,3,9,15			9	Bernhard et al., 1997
Eubuliminella exilis	dysoxic	16,17,18			10	Moffitt et al., 2015
Euloxostomum pseudobeyrichii	dysoxic	1,5,7,9,20			11	Resig, 1990
Globobulimina affinis	dysoxic	2			12	Ovsepyan et al., 2013
Globobulimina auriculata	dysoxic	2,4,12			13	Bubenshchikova et al., 2010
Globobulimina pacifica	dysoxic	2,14			14	Mallon et al., 2012
Globobulimina pyrula	dysoxic	2			15	Hermelin and Schimmield, 1990
Globobulimina spinifera	dysoxic	2			16	Caulle et al., 2014
Nonionella auris	dysoxic	21			17	den Dulk et al., 1998
Nonionella stella	dysoxic	1,5,9,13,14,20,22			18	Jannink et al., 1998
Takayanagia delicata	dysoxic	1,20,21,13			19	Patarroyo and Martinez, 2020
Virgulinella fragilis	dysoxic	22			20	Ohkushi et al., 2013
Suggrunda eckisi	dysoxic	1,9			21	Erdem and Schonfeld, 2017
Bolivina argentea	suboxic	1,3,5,8,9,20			22	Leiter and Altenbach, 2010
Bolivina costata	suboxic	14,21
Bolivina interjuncta	suboxic	1,14,21
Bolivina pacifica	suboxic	1,13,21,22
Bolivina plicata	suboxic	1,21
Bolivina spissa	suboxic	1,3,5,6,13,14,20
Bolivina subspinescens	suboxic	2
Cancris carmenensis	suboxic	14
Epistominella obesa	suboxic	1
Epistominella pacifica	suboxic	1,3,4,5,8,20,21
Epistominella smithi	suboxic	1,3,20,21
Fursenkoina cornuta	suboxic	1,2,9,16
Hansenisca soldanii	suboxic	2,13,16
Nonionellina labradorica	suboxic	4,5,12,13
Rotaliatinopsis semiinvoluta	suboxic	16,17,18
Stainforthia fusiformis	suboxic	9,11,14
Uvigerina akitaensis	suboxic	2,13
Uvigerina peregrina	suboxic	1,2,3,5,8,14,15,16,17,18
Uvigerina spinicostata	suboxic	2
